# Supplementary material for: Invariant surface glycoprotein 65 of Trypanosoma brucei is a complement C3 receptor
Source: PubMed Central journal article supplement (PMC9424271; doi:10.1038/s41467-022-32728-9), 2022-08-29
Supplement: 41467_2022_32728_MOESM2_ESM.pdf [file 41467_2022_32728_MOESM2_ESM.pdf]

## ***Description of additional supplementary files***

### ***Supplementary data 1: ISG65 sequences***

Sequences for each of the ISG65 genes in the EATRO1125, TREU927 and Lister 427 strains from *T. b. brucei*.

### ***Supplementary data 2: SAXS data***

Raw scattering data for small angle x-ray scattering analysis of the ISG65-C3d complex.
